# Supplementary material for: Antioxidant, Pro-Survival and Pro-Regenerative Effects of Conditioned Medium from Wharton’s Jelly Mesenchymal Stem Cells on Developing Zebrafish Embryos
Source: MDPI journal article supplement (doi:10.3390/ijms241713191), 2023-08-25
Supplement: s1 [file s1]

**Table S1. List of gene-specific oligonucleotides used in the RT-qPCR and ChIP-pPCR experiments.**

| Target gene                | Forward (F) and Reverse (R) sequences (5' to 3')       | Length   | Amplicon size (bp) | Figures in which oligonucleotide pair was used |
|----------------------------|--------------------------------------------------------|----------|--------------------|------------------------------------------------|
| <i>baxa</i>                | F: GACAGGGATGCTGAAGTGAC<br>R: GTCGGCTGAAGATTAGAGTTG    | 20<br>21 | 158                | 6A                                             |
| <i>bcl2l1</i>              | F: TAGACAACCATATTCAACCCTG<br>R: ACCCGTGAGCAAGGTCATTC   | 22<br>20 | 149                | 6A                                             |
| <i>bdnf</i>                | F: TTGGCGAAGAGCGGACGAAT<br>R: ATAGTAACGAACAGGATGGTCA   | 20<br>22 | 154                | 4A                                             |
| <i>bim</i>                 | F: CAGCGATTCTGTGCCAGGTT<br>R: AGTTCACGAGCGACCACCAT     | 20<br>20 | 159                | 6A                                             |
| <i>brg1</i>                | F: CTTCACTGGAGGCATCGTTC<br>R: AAGAGCAGCACTTTGTGGTTG    | 20<br>21 | 114                | 4A                                             |
| <i>casp3a</i>              | F: TACAATGACCAGACAGTTGCG<br>R: ATCCACAGATGTATCAGTGCC   | 21<br>21 | 144                | 6A                                             |
| <i>casp8</i>               | F: AGGTTCAGGAATCAGAGTCAC<br>R: ATTGTGCCAGCCGAAGAGTTT   | 21<br>21 | 131                | 6A                                             |
| <i>cat</i>                 | F: ATGAAGCCGAGAGAGAGCGT<br>R: TCAGCGTTGTGTTTATCCAGG    | 20<br>21 | 154                | 4A                                             |
| <i>foxO3a</i>              | F: CAGATTTATGATTGGATGGTCC<br>R: ACTATGGAGCGACAGGTTATG  | 22<br>21 | 111                | 4A                                             |
| <i>ldha</i>                | F: GTTGGAATGGTTGGAATGGCT<br>R: CTTGTGCGTCTTGAGAAACAG   | 21<br>21 | 147                | 4A                                             |
| <i>mcl1a</i>               | F: TACCGACGATGAAGCGAGTG<br>R: CTGATGAAGTCCAGAGAGGC     | 20<br>20 | 115                | 6A                                             |
| <i>nrf2</i>                | F: TGCTGTCACTCCCAGAGTTG<br>R: TGTTTGAGCCGAGCCGAGAT     | 20<br>20 | 152                | 4A                                             |
| <i>sirt1</i>               | F: CTGTAAGCATAAGGTGGACTG<br>R: TACGGGACATCAGACGGACA    | 21<br>20 | 93                 | 4A                                             |
| <i>sirt6</i>               | F: GACACGGTGGTCGGAGTGA<br>R: TCGCCTGCTCGCCTCATCA       | 19<br>19 | 168                | 4A                                             |
| <i>sod2</i>                | F: TGTGCTAACCAAGACCCTTTG<br>R: AACGCTCGCTGACATTCTCC    | 21<br>20 | 160                | 4A                                             |
| <i>actb2</i> <sup>§</sup>  | F: ATCACACCTTCTACAACGAGC<br>R: GGCATACAGGGACAGCACAG    | 21<br>20 | 173                | 4A and 6A                                      |
| <i>rpl13a</i> <sup>§</sup> | F: AGGTGTGAGGGTATCAACATC<br>R: TTGGTTTTGTGTGGAAGCATAC  | 21<br>22 | 170                | 4A and 6A                                      |
| <i>p-cat</i>               | F: ACATCTATGAACCAAACCATTGA<br>R: ATGACATCTTTCCAGTTACAG | 23<br>22 | 230                | 4B                                             |
| <i>p-ldha</i>              | F: GTAGAGCAAGTAGTTTGACCG<br>R: TGTGGCATAGGCAGTATTGAC   | 21<br>21 | 147                | 4B                                             |

<sup>§</sup> The *actin-beta2* (*actb2*) and *ribosomal protein L13a* (*rpl13a*) mRNAs were used to normalize all RT-qPCR data.
